# Supplementary material for: Discovery, Genomic Sequence Characterization and Phylogenetic Analysis of Novel RNA Viruses in the Turfgrass Pathogenic Colletotrichum spp. in Japan
Source: MDPI journal article supplement (doi:10.3390/v14112572), 2022-11-20
Supplement: s1 [file s1]

Supplementary Table S1: Primers used in RT-PCR validation of mycovirus genome segments identified in FLDS

| Contigs      | Length (nt) | Target    | FP                     | RP                    | Tm          |
|--------------|-------------|-----------|------------------------|-----------------------|-------------|
| S 264_5_full | 891         | 363-1234  | TGCGAACAAACGTTTCCGAC   | TCGAAGAACTTCGCTGCCTT  | 59.97/59.97 |
| S264_1_full  | 831         | 211-1042  | GAGACTGATTTTCGCTGGCCT  | GCGCTACCACCTTCGTA CTT | 60/60       |
| S264_2_full  | 619         | 207-825   | CCTGGTCGCTTTTCTCCAGT   | GATCATAGTGTCGGCGTCGT  | 60/60       |
| S264_3_full  | 711         | 780-1471  | TCAGAGCAGTCTTTGGCGTT   | AGCTGAGTACTGACATGCCG  | 60/60       |
| S264_4_full  | 717         | 549-1265  | ACGTTGGATTTCCCCGATGT   | GCCATGCTGATGCACATCTC  | 60/60       |
| S264_7_full  | 1803        | 360-1191  | AACGTCTTAAACGCCTCCGT   | TTCACGGGTACCAAGTCTGC  | 60/60       |
| S264_6_full  | 1755        | 488-1363  | ACGGACCGAGACTGTCACTA   | CTCCAGGACGCTGTTTGTCT  | 60/60       |
| S264_8_full  | 797         | 4478-5275 | TGGACAGACGAACAGCACAATC | CATGACCGAGAACAAACGGC  | 58/57       |
| S288_2_full  | 738         | 3187-3924 | CAGCGCATATGTCCTGCAAC   | TGCCAGATTGCATGCCCTTA  | 60/60       |
| S288_1_full  | 2947        | 1975-2585 | GACCGCAAAGGCATTCCAAG   | AGCTAGGAGCGGTGGCAATC  | 57/59       |

Supplementary Table S2: Mapping report of FLDS of dsRNA of MBCT-264 and MBCT-288

|                                   | Count     | Percentage of reads | Average length | Number of bases |
|-----------------------------------|-----------|---------------------|----------------|-----------------|
| <b>dsRNA of MBCT-264</b>          |           |                     |                |                 |
| Total reads                       | 1,536,110 | 100.00%             | 125.97         | 93,496,749      |
| Virus contigs                     | 8         | -                   | 2,362.12       | 18,897          |
| Mapped reads to virus contigs     | 1,523,226 | 99.16%              | 126.23         | 192,279,571     |
| Not mapped reads to virus contigs | 12,884    | 0.84%               | 94.47          | 1,217,178       |
| Reads in pairs                    | 760,412   | 49.50%              | 376.81         | 96,159,304      |
| Broken paired reads               | 762,814   | 49.66%              | 126.01         | 96,120,267      |
| <b>dsRNA of MBCT-288</b>          |           |                     |                |                 |
| Total reads                       | 1,445,468 | 100.00%             | 121.60         | 175,765,255     |
| Virus contigs                     | 2         | -                   | 5,075.00       | 10,150          |
| Mapped reads to virus contigs     | 1,312,155 | 90.78%              | 121.91         | 159,959,167     |
| Not mapped reads to virus contigs | 133,313   | 9.22%               | 118.56         | 15,806,088      |
| Reads in pairs                    | 732,714   | 50.69%              | 370.01         | 89,364,439      |
| Broken paired reads               | 579,441   | 40.09%              | 121.83         | 70,594,728      |

Supplementary Table S3: Virus contigs identified from FLDS-reads generated from *Colletotrichum* strains MBCT-264 and MBCT-288 dsRNAs

| SL                        | Contig      | Length<br>(bp) | Counts  | 5'                    | 3'                        |
|---------------------------|-------------|----------------|---------|-----------------------|---------------------------|
| FLDS of dsRNA of MBCT-264 |             |                |         |                       |                           |
| CaPV1                     |             |                |         |                       |                           |
| 1                         | S264_5_full | 1728           | 171656  | CGTTTTGAAGGGCAAAAACG  | CTCGTTCAACACCAAGAACC      |
| 2                         | S264_1_full | 1388           | 753283  | CGTTTAGTTAAGTGGACTCA  | TTCTGTTCAACAAGAACTCC      |
| 3                         | S264_2_full | 1160           | 338478  | CGTTTAGAGACGGTGTTTCAT | TGTCTTTCAACAAATAAACC      |
| CaPV2                     |             |                |         |                       |                           |
| 4                         | S264_3_full | 1958           | 116041  | AGAATTTCTTTCCTAATACT  | AAAAAACGAAAAAAAAATAAA     |
| 5                         | S264_4_full | 1872           | 99372   | AGAATTTCTTTCCTATTAA   | AAAAAAAAGGAAAAAAAAACATAAA |
| 6                         | S264_7_full | 1803           | 15810   | AGAATTTCTTCTCCTAGATA  | AAAAAAAAGTAAAAAATAAA      |
| 7                         | S264_6_full | 1755           | 19427   | AGAATTTCTTCTCCTAAAAT  | AAATGAAAAAAAAAAAAATAAA    |
| CaNSRV1                   |             |                |         |                       |                           |
| 8                         | S264_8_full | 7233           | 8753    | CCCTTGGCTAATTACACGAAA | TTGCCAAGGGGGTCTTTGTG      |
| FLDS of dsRNA of MBCT-288 |             |                |         |                       |                           |
| CaNSRV2                   |             |                |         |                       |                           |
| 9                         | S288_2_full | 7203           | 247752  | ATAAAAGAAAAGAAGACCTT  | TTTATACAACCTATTCTAA       |
| 10                        | S288_1_full | 2947           | 1064402 | ACGAAAAAGAAAGAAACCCT  | AAAAAATCAATCTTATTCTAA     |

Supplementary Table S4: BLASTp search of ORF1(RdRp) of Colletotrichum associated partitivirus 1 (CaPV1) using the non-redundant protein sequences database of NCBI

| Virus name                                                     | Query Cover | E value   | Per. ident | Acc. Len | Accession                      |
|----------------------------------------------------------------|-------------|-----------|------------|----------|--------------------------------|
| Colletotrichum gloeosporioides partitivirus 1 (CgPV1)          | 100%        | 0         | 88.95      | 525      | <a href="#">QED88095.1</a>     |
| Plasmopara viticola lesion associated Partitivirus 4 (PvLaPV4) | 98%         | 0         | 72.78      | 523      | <a href="#">QHD64807.1</a>     |
| Plasmopara viticola lesion associated Partitivirus 3 (PvLaPV3) | 98%         | 0         | 73.35      | 523      | <a href="#">QHD64801.1</a>     |
| Erysiphe necator associated partitivirus 7 (EnaPV7)            | 98%         | 0         | 72.96      | 523      | <a href="#">QJW70316.1</a>     |
| Macrophomina phaseolina partitivirus 1 (MpPV1)                 | 96%         | 0         | 71.94      | 512      | <a href="#">QKO02079.1</a>     |
| Ustilaginoidea virens partitivirus 3 (UvPV3)                   | 96%         | 0         | 66.53      | 522      | <a href="#">AGJ03719.1</a>     |
| Ustilaginoidea virens partitivirus 2 (UvPV2)                   | 96%         | 0         | 64.62      | 529      | <a href="#">YP_008327312.1</a> |
| Aspergillus flavus partitivirus 1 (AfPV1)                      | 96%         | 0         | 53.31      | 548      | <a href="#">QDE53634.1</a>     |
| Botryosphaeria dothidea virus 1 (BdV1)                         | 98%         | 0         | 52.48      | 544      | <a href="#">AIE47694.1</a>     |
| Colletotrichum acutatum RNA virus 1 (CaRV1)                    | 96%         | 0         | 52.22      | 540      | <a href="#">AGL42312.1</a>     |
| Aspergillus niger partitivirus 1 (AnPV1)                       | 96%         | 0         | 51.84      | 542      | <a href="#">BDF97658.1</a>     |
| Fusarium cerealis partitivirus 1 (FcPV1)                       | 97%         | 9.00E-177 | 49.81      | 528      | <a href="#">QOL02536.1</a>     |
| Erysiphe necator associated gammapartitivirus 1 (EnaGPV1)      | 87%         | 9.00E-71  | 36.62      | 543      | <a href="#">QKK35392.1</a>     |
| Aspergillus ochraceous virus (AoV)                             | 86%         | 6.00E-68  | 34.42      | 539      | <a href="#">AYP71818.1</a>     |
| Aspergillus ochraceous virus (AoV)                             | 86%         | 1.00E-67  | 34.2       | 539      | <a href="#">YP_009665972.1</a> |
| Aspergillus ochraceous virus (AoV)                             | 86%         | 1.00E-67  | 33.98      | 539      | <a href="#">ABC86749.1</a>     |
| Colletotrichum truncatum partitivirus 1 (CtPV1)                | 85%         | 3.00E-67  | 35.87      | 539      | <a href="#">ALF46547.1</a>     |
| Phyllosticta citriasiana partitivirus 1 (PcPV1)                | 85%         | 2.00E-65  | 35.64      | 535      | <a href="#">AZT88588.1</a>     |

|                                                       |     |          |       |     |                            |
|-------------------------------------------------------|-----|----------|-------|-----|----------------------------|
| Fusarium mangiferae partitivirus 2 (FmPV2)            | 85% | 3.00E-65 | 34.57 | 539 | <a href="#">UBZ25878.1</a> |
| Sodiomyces alkalinus partitivirus 2 (SaPV2)           | 85% | 7.00E-65 | 34.93 | 520 | <a href="#">ATP85067.1</a> |
| Botryotinia fuckeliana partitivirus 1 (BfPV1)         | 85% | 9.00E-65 | 34.35 | 540 | <a href="#">QJQ28886.1</a> |
| Laodelphax striatella associated partitivirus (LsaPV) | 86% | 2.00E-64 | 32.9  | 538 | <a href="#">AZU96334.1</a> |
| Aspergillus fumigatus partitivirus 1 (AfuPV1)         | 86% | 1.00E-59 | 32.19 | 542 | CAY25801.2                 |
| Ophiostoma partitivirus 1 (OpPV1)                     | 87% | 1.00E-59 | 31.71 | 539 | YP_009508238.1             |
| Gremmeniella abietina RNA virus MS1 (GaRVMS1)         | 84% | 2.00E-63 | 33.56 | 539 | NP_659027.1                |
|                                                       |     |          |       |     |                            |

Supplementary Table S5: BLASTp search of ORF2 (Putative hypothetical /capsid protein) of Colletotrichum associated partitivirus 1 (CaPV1) using the non- redundant protein sequences database of NCBI

| Virus Name                                                     | Query Cover | E value   | Per. Ident | Acc. Len | Accession      |
|----------------------------------------------------------------|-------------|-----------|------------|----------|----------------|
| Colletotrichum gloeosporioides partitivirus 1 (CgPV1)          | 100%        | 0         | 73.4       | 375      | QED88096.1     |
| Plasmopara viticola lesion associated Partitivirus 4 (PvLaPV4) | 100%        | 2.00E-172 | 65.33      | 374      | QHD64811.1     |
| Phoma mattheuicola partitivirus 1 (PmPV1)                      | 100%        | 1.00E-166 | 63.4       | 376      | QDK65070.1     |
| Erysiphe necator associated partitivirus 7 (EnaPV7)            | 98%         | 5.00E-155 | 59.95      | 373      | QJW70323.1     |
| Ustilaginoidea virens partitivirus 2 (UvPV2)                   | 99%         | 3.00E-142 | 56.65      | 375      | YP_008327313.1 |
| Ustilaginoidea virens partitivirus (UvPV)                      | 99%         | 1.00E-140 | 56.65      | 375      | AGO04404.1     |
| Macrophomina phaseolina partitivirus 1 (MpPV1)                 | 99%         | 8.00E-133 | 53.23      | 374      | QKO02080.1     |
| Ustilaginoidea virens mycovirus (UvMV)                         | 97%         | 2.00E-112 | 47.96      | 371      | AGJ03720.1     |
| Aspergillus niger partitivirus 1 (AnPV1)                       | 97%         | 1.00E-25  | 27.22      | 371      | BDF97659.1     |
| Colletotrichum acutatum RNA virus 1 (CaRV1)                    | 97%         | 3.00E-21  | 25.41      | 370      | AGL42313.1     |
| Botryosphaeria dothidea virus 1 (BdV1)                         | 97%         | 1.00E-18  | 26.4       | 370      | AIE47695.1     |
| Aspergillus flavus partitivirus 1 (AfPV1)                      | 97%         | 6.00E-16  | 23.99      | 369      | QDE53635.1     |
| Fusarium cerealis partitivirus 1 (FcPV1)                       | 97%         | 2.00E-10  | 21.93      | 378      | QOL02537.1     |

Supplementary Table S6: BLASTp searches of the deduced amino acid sequences of RdRp of Colletotrichum associated partitivirus 2 (CaPV2) and related partitiviruses in nr database of protein sequences

| Scientific Name                                               | Query Cover | E value   | Per. ident | Acc. Len | Accession      |
|---------------------------------------------------------------|-------------|-----------|------------|----------|----------------|
| Plasmopara viticola lesion associated Partitivirus 9 (PvaPV9) | 100%        | 0         | 90.62      | 608      | QHD64790.1     |
| Fusarium solani partitivirus 2 (FsPV2)                        | 99%         | 0         | 87.64      | 608      | BAQ36631.1     |
| Monilinia partitivirus A (MoPVA)                              | 99%         | 0         | 61.9       | 604      | QED42950.1     |
| Hygrophorus penarioides partitivirus 1 (HpPV1)                | 95%         | 0         | 56.72      | 607      | QQO86653.1     |
| Partitiviridae sp.                                            | 99%         | 0         | 54.92      | 611      | UDL14345.1     |
| Rhizoctonia solani partitivirus 7 (RsPV7)                     | 99%         | 0         | 54.95      | 609      | QDW81313.1     |
| Sarcosphaera coronaria partitivirus (ScPV)                    | 95%         | 0         | 55.02      | 634      | QLC36809.1     |
| Rosellinia necatrix partitivirus 7 (RnPV7)                    | 99%         | 0         | 52.88      | 608      | BAT32942.1     |
| Rhizoctonia oryzae-sativae partitivirus 5 (RoPV)              | 99%         | 0         | 51.96      | 613      | BCY26960.1     |
| Rosellinia necatrix partitivirus 22 (RnPV22)                  | 95%         | 0         | 52.84      | 613      | BBU59852.1     |
| Sarcosphaera coronaria partitivirus (ScPV)                    | 99%         | 0         | 48.78      | 618      | QLC36810.1     |
| Rhizoctonia solani partitivirus 1 (RsPV1)                     | 93%         | 2.00E-179 | 49.74      | 603      | AND83003.1     |
| Rhizoctonia solani dsRNA virus 18 (RsDRV18)                   | 94%         | 5.00E-176 | 47.1       | 630      | UIW13809.1     |
| Sclerotinia sclerotiorum partitivirus S (SsPVs)               | 91%         | 5.00E-163 | 47.24      | 580      | YP_003082248.1 |
| Flammulina velutipes isometric virus (FvIV)                   | 95%         | 7.00E-159 | 45.39      | 587      | BAH08700.1     |
| Rosellinia necatrix partitivirus 26 (RnPV26)                  | 99%         | 1.00E-155 | 43.59      | 584      | QMU26430.1     |

|                                         |     |           |       |     |            |
|-----------------------------------------|-----|-----------|-------|-----|------------|
| Scutellospora partitivirus B (SPVB)     | 92% | 2.00E-147 | 45.07 | 531 | QED43041.1 |
| Ceratobasidium partitivirus (CbPV)      | 89% | 3.00E-144 | 44.28 | 548 | AOX47573.1 |
| Erysiphe necator partitivirus 2 (EnPV2) | 92% | 2.00E-139 | 42.15 | 577 | ATS94403.1 |
| Botrytis cinerea partitivirus 2 (BcPV2) | 91% | 1.00E-122 | 43.14 | 579 | QBA69894.1 |



Supplementary Table S7: BLASTp search of ORF2 (Coat /capsid protein) of Colletotrichum associated partitivirus 2 (CaPV2) using the non-redundant (nr) protein sequences database of NCBI

| Scientific Name                                                | Query Cover | E value  | Per. ident | Acc. Len | Accession  |
|----------------------------------------------------------------|-------------|----------|------------|----------|------------|
| Plasmopara viticola lesion associated Partitivirus 9 (PvLaPV9) | 99%         | 0        | 77.74      | 541      | QHD64805.1 |
| Plasmopara viticola lesion associated Partitivirus 2 (PvLaPV2) | 89%         | 0        | 69.48      | 485      | QHD64794.1 |
| Lichen partiti-like RNA virus 1 (LplRV1)                       | 97%         | 8.00E-96 | 35.79      | 534      | BCD56382.1 |
| Rosellinia necatrix partitivirus 5 (RnPV5)                     | 93%         | 3.00E-33 | 26.22      | 576      | BCB16796.1 |
| Hygrophorus penarioides partitivirus 1 (HpPV1)                 | 84%         | 9.00E-28 | 25.5       | 574      | QQO86654.1 |
| Rosellinia necatrix partitivirus 22 (RnPV22)                   | 87%         | 4.00E-27 | 24.33      | 584      | BBU59853.1 |
| Sarcosphaera coronaria partitivirus (ScPV)                     | 93%         | 5.00E-27 | 24.55      | 585      | QLC36765.1 |
| Rhizoctonia oryzae-sativae partitivirus 5 (RosPV5)             | 82%         | 2.00E-24 | 23.81      | 567      | BCY26961.1 |
| Trichoderma atroviride partitivirus 1 (TaPV1)                  | 90%         | 6.00E-20 | 22.59      | 577      | AYQ58322.1 |
| Caloscypha fulgens partitivirus 7 (CfPV7)                      | 56%         | 1.00E-19 | 25.08      | 569      | QOI17260.1 |
| Rhizoctonia solani partitivirus 7 (RsPV7)                      | 68%         | 4.00E-17 | 23.04      | 567      | QDW81314.1 |
| Pear alphapartitivirus (PAPV)                                  | 53%         | 3.00E-15 | 28.91      | 491      | BBA66578.1 |
| Aspergillus flavus partitivirus 2 (AfPV2)                      | 70%         | 1.00E-12 | 21.65      | 509      | UAW09572.1 |
| Medicago sativa alphapartitivirus 1 (MsAPV1)                   | 52%         | 2.00E-12 | 26.96      | 491      | ATJ00051.1 |
| Rosellinia necatrix partitivirus 23 (RnPV 23)                  | 66%         | 4.00E-12 | 22.68      | 514      | BBU59855.1 |
| Soybean leaf-associated partitivirus 2 (SLaPV2)                | 54%         | 7.00E-11 | 25.25      | 496      | ALM62248.1 |
| Rhizoctonia oryzae-sativae partitivirus 1 (RosPV1)             | 40%         | 4.00E-10 | 28.57      | 485      | AYV61426.1 |
| Rhizoctonia oryzae-sativae partitivirus 1 (RosPV1)             | 47%         | 1.00E-09 | 26.87      | 485      | BCY26953.1 |
| Rosellinia necatrix partitivirus 12 (RnPV12)                   | 60%         | 6.00E-09 | 25.36      | 533      | BBU59834.1 |
| Heterobasidion partitivirus 21 (HbPV21)                        | 30%         | 7.00E-09 | 30.3       | 495      | UHK02581.1 |
| Rosellinia necatrix partitivirus 24 (RnPV24)                   | 42%         | 9.00E-09 | 23.29      | 498      | BBU59857.1 |

Supplementary Table S8. BLASTp analysis of Colletotrichum associated negative stranded RNA virus 1 (CaNSRV-1) RdRp in the NCBI nr protein database

| Scientific Name                                               | Query Cover | E value   | Per. ident | Acc. Len | Accession      |
|---------------------------------------------------------------|-------------|-----------|------------|----------|----------------|
| Grapevine associated cogu-like virus 2(GaCLV2)                | 99%         | 0         | 69.78      | 2391     | QIJ25707.1     |
| Grapevine associated cogu-like virus 3 (GaCLV3)               | 99%         | 0         | 69.73      | 2385     | QIJ25710.1     |
| Laurel Lake virus (LLV)                                       | 99%         | 0         | 61.82      | 2384     | YP_009667028.1 |
| Grapevine associated cogu-like virus 4 (GaCLV4)               | 94%         | 0         | 64.36      | 2235     | QMP81963.1     |
| Hainan phenui-like virus 7 (HPLV7)                            | 99%         | 0         | 61.29      | 2404     | QYF49558.1     |
| Watermelon crinkle leaf-associated virus 1 (WCLaV1)           | 81%         | 0         | 35.31      | 2182     | ASY01340.1     |
| Citrus concave gum-associated virus (CCGaV)                   | 89%         | 0         | 33.47      | 2184     | QDK54399.1     |
| Citrus leaf flecking-associated virus (CLFaV)                 | 89%         | 0         | 33.46      | 2184     | QBZ68778.1     |
| Citrus virus A (CVA)                                          | 89%         | 0         | 32.24      | 2184     | QPF47541.1     |
| Watermelon crinkle leaf-associated virus 2 (WCLaV2)           | 77%         | 0         | 34.29      | 2198     | ASY01343.1     |
| Yunnan Paris negative-stranded virus (YPNSV)                  | 82%         | 0         | 34.32      | 2181     | QVU28732.1     |
| Brassica campestris chinensis coguvirus 1 (BCCCV1)            | 77%         | 0         | 34.58      | 2200     | UFE16634.1     |
| Sanya phenuvirus 1 (SPV1)                                     | 83%         | 0         | 32.55      | 2206     | UHM27566.1     |
| Grapevine associated cogu-like virus 1 (GaCLV1)               | 73%         | 0         | 34.15      | 2197     | QIJ25704.1     |
| Botrytis cinerea bocivirus 1 (BcBV1)                          | 77%         | 0         | 32.32      | 2211     | QJT73693.1     |
| Lentinula edodes negative-strand RNA virus 3 (LeNSRV3)        | 79%         | 0         | 31.49      | 2308     | QOX06031.1     |
| Alternaria tenuissima negative-stranded RNA virus 2 (AtNSRV2) | 74%         | 3.00E-117 | 24.31      | 2063     | QDB75016.1     |
| Bhanja virus (BhV)                                            | 68%         | 1.00E-99  | 24.59      | 2082     | AGC60111.1     |

Supplementary Table S9: BLASTp analysis of RdRp of Colletotrichum associated negative stranded RNA virus 2 (CaNSRV-2) RdRp in the NCBI nr protein database

| Virus Name                                                             | Query Cover | E value | Per. Ident | Acc. Len | Accession      |
|------------------------------------------------------------------------|-------------|---------|------------|----------|----------------|
| Fusarium poae negative-stranded virus 1 (FpNSV1)                       | 100%        | 0       | 65.69      | 2346     | YP_009272911.1 |
| Plasmopara viticola lesion associated mycoophiovirus 5 (PvLaMoV5)      | 100%        | 0       | 65.64      | 2346     | QJX19791.1     |
| Cladosporium cladosporioides negative-stranded RNA virus 1 (CcNSRV1)   | 100%        | 0       | 65.26      | 2359     | QDB75017.1     |
| Grapevine-associated negative single-stranded RNA virus 4 (GaNSRV4)    | 93%         | 0       | 65.89      | 2203     | QXN75414.1     |
| Plasmopara viticola lesion associated mycoophiovirus 4 (PvLaMoV4)      | 100%        | 0       | 59.82      | 2346     | QJX19790.1     |
| Erysiphe necator associated negative-stranded RNA virus 12 (EnaNSRV12) | 100%        | 0       | 59.69      | 2346     | QJW70351.1     |
| Sclerotinia sclerotiorum ophiovirus like virus 1 (SsOLV1)              | 98%         | 0       | 42.78      | 2365     | QUE49149.1     |
| Sclerotinia sclerotiorum negative-stranded RNA virus 9 (SsNSRV9)       | 98%         | 0       | 42.76      | 2365     | AYA73395.1     |
| Sanya aspivirus 1 (SAV1)                                               | 90%         | 0       | 31.01      | 2664     | UHM27585.1     |
| Plasmopara viticola lesion associated mycoophiovirus 1 (PvLaMoV1)      | 92%         | 0       | 29.33      | 2739     | QJX19787.1     |
| Rhizoctonia solani negative-stranded virus 2 (RsNSV2)                  | 79%         | 0       | 31.69      | 2381     | ALD89130.1     |
| Rhizoctonia solani negative-stranded virus 3 (RsNSV3)                  | 81%         | 0       | 30.8       | 2380     | ALD89111.1     |
| Rhizoctonia solani negative-stranded virus 1 (RsNSV1)                  | 91%         | 0       | 29.14      | 2411     | ALD89129.2     |

|                                                           |     |           |       |      |                |
|-----------------------------------------------------------|-----|-----------|-------|------|----------------|
| Phlebiopsis gigantea negative-strand virus 1 (PgNSV1)     | 82% | 0         | 30.21 | 2375 | UJT31808.1     |
| Culex tritaeniorhynchus Aspiviridae-related virus (CtArV) | 74% | 0         | 32.59 | 2388 | BBQ04833.1     |
| Grapevine-associated serpento-like virus 1 (GaSLV 1)      | 92% | 0         | 28.05 | 2377 | QXN75438.1     |
| Soybean thrips negative-stranded RNA virus 7 (StNSRV7)    | 78% | 1.00E-156 | 26.49 | 2941 | QQO81450.1     |
| Soybean thrips negative-stranded RNA virus 1 (StNSRV1)    | 78% | 2.00E-153 | 26.32 | 2942 | QQX28961.1     |
| Soybean thrips negative-stranded RNA virus 3 (StNSRV3)    | 62% | 5.00E-150 | 28.12 | 2942 | QQX28974.1     |
| Wilkie ophio-like virus 1 (WOpV1)                         | 79% | 3.00E-149 | 26.32 | 2061 | ASA47457.1     |
| Mirafiori lettuce big-vein ophiovirus (MiLBVOV)           | 43% | 2.00E-57  | 24.38 | 2280 | QZA75361.1     |
| Lettuce ring necrosis virus (LRNV)                        | 43% | 9.00E-54  | 24.06 | 2277 | QTP72396.1     |
| Ranunculus white mottle virus (RWMV)                      | 41% | 5.00E-47  | 22.76 | 2291 | AWJ64314.1     |
| Blueberry mosaic associated virus (BMaV)                  | 19% | 5.00E-42  | 29.25 | 2337 | BAV13384.1     |
| Citrus psorosis ophiovirus (CPOV)                         | 48% | 3.00E-41  | 22.11 | 2416 | AXJ14438.1     |
| Soybean cyst nematode nyami-like virus (SCNNLV)           | 21% | 8.00E-13  | 22.42 | 2064 | AVK42875.1     |
| Chimay rhabdovirus (ChRV)                                 | 22% | 1.00E-07  | 23.24 | 2199 | AVM86063.1     |
| Wenling chuvirus-like virus 2 (WCLV2)                     | 19% | 1.00E-04  | 20.69 | 2212 | YP_009333151.1 |
| Tacheng Tick Virus 6 (TTV6)                               | 13% | 0.002     | 25.42 | 2083 | YP_009304420.1 |

Supplementary Table S10: BLASTp analysis of ORF7 of CaNSRV-2

| Description                                                      | Scientific Name              | Query Cover | E value   | Per. ident | Acc. Len | Accession    |
|------------------------------------------------------------------|------------------------------|-------------|-----------|------------|----------|--------------|
| hypothetical protein E4U09_005733 [Claviceps aff. purpurea]      | Claviceps aff. purpurea      | 92%         | 3.00E-116 | 54.58      | 308      | KAG6288140.1 |
| hypothetical protein E4U34_002436 [Claviceps purpurea]           | Claviceps purpurea           | 92%         | 4.00E-114 | 54.25      | 308      | KAG6221060.1 |
| hypothetical protein E4U12_002732 [Claviceps purpurea]           | Claviceps purpurea           | 92%         | 5.00E-114 | 53.92      | 308      | KAG6133501.1 |
| hypothetical protein E4U57_006530 [Claviceps arundinis]          | Claviceps arundinis          | 92%         | 7.00E-114 | 55.56      | 306      | KAG5963027.1 |
| hypothetical protein E4U11_003042 [Claviceps purpurea]           | Claviceps purpurea           | 92%         | 3.00E-113 | 53.92      | 308      | KAG6161930.1 |
| hypothetical protein E4U36_005246 [Claviceps purpurea]           | Claviceps purpurea           | 92%         | 9.00E-113 | 53.92      | 308      | KAG6179915.1 |
| hypothetical protein E4U22_003398 [Claviceps purpurea]           | Claviceps purpurea           | 92%         | 1.00E-112 | 52.94      | 308      | KAG6310255.1 |
| hypothetical protein E4U40_001024 [Claviceps sp. LM458 group G5] | Claviceps sp. LM458 group G5 | 89%         | 3.00E-112 | 54.55      | 303      | KAG6036368.1 |
| hypothetical protein E4U30_005859 [Claviceps sp. LM220 group G6] | Claviceps sp. LM220 group G6 | 92%         | 4.00E-112 | 52.61      | 308      | KAG6099838.1 |
| hypothetical protein E4U24_002570 [Claviceps purpurea]           | Claviceps purpurea           | 92%         | 4.00E-112 | 53.59      | 308      | KAG6248664.1 |
| hypothetical protein [Toensbergia leucococca]                    | Toensbergia leucococca       | 61%         | 4.00E-52  | 45.54      | 210      | MCJ1231429.1 |
| hypothetical protein EPUL_006619 [Erysiphe pulchra]              | Erysiphe pulchra             | 88%         | 6.00E-42  | 30.98      | 423      | POS82076.1   |
