# Supplementary figures and images for: Discovery, Genomic Sequence Characterization and Phylogenetic Analysis of Novel RNA Viruses in the Turfgrass Pathogenic Colletotrichum spp. in Japan
Source: MDPI journal article supplement (doi:10.3390/v14112572), 2022-11-20

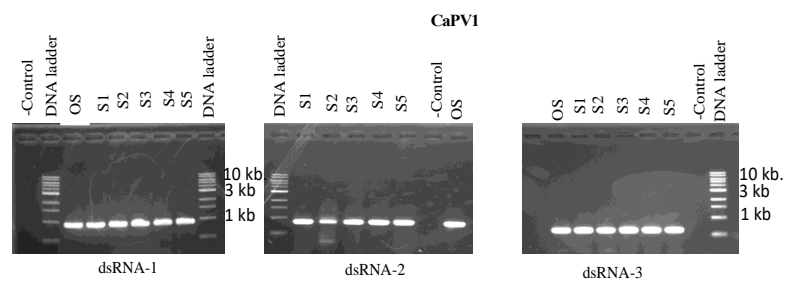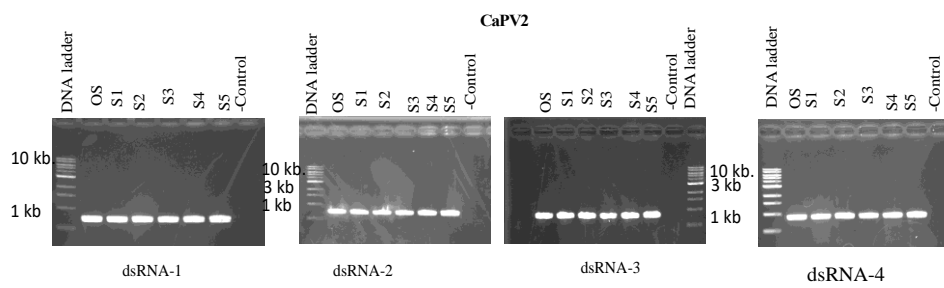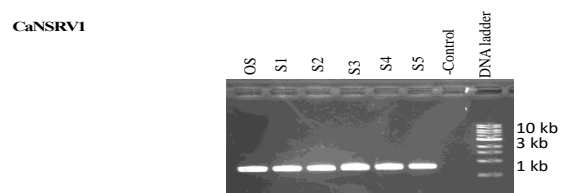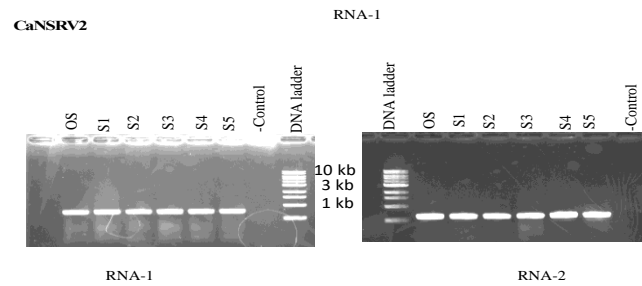

Supplement: s1 [file s1]
